# Supplementary material
Source: publisher figshare collection journal article supplement (https://frontiersin.figshare.com/ndownloader/files/15100325)
Supplement: Supplementary file [file 15100325]

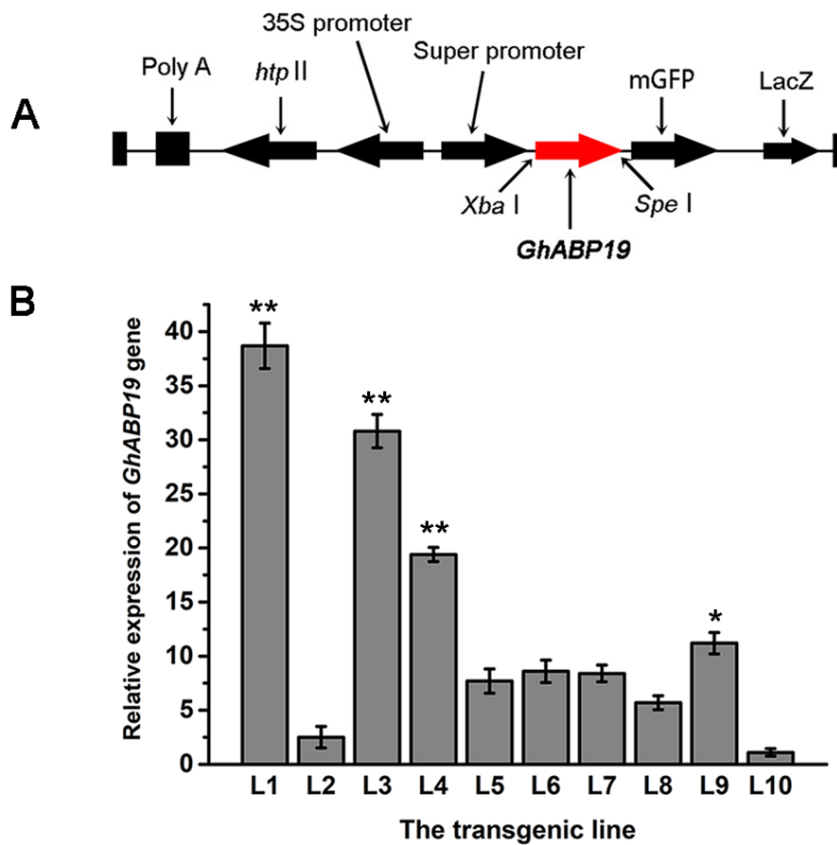

Supplementary Figure 1. Genetic transformation of *Arabidopsis* with *GhABP19* and identification of transgenic lines. **(A)** Outline of the Super-pCambia1300 transformation vector with *GhABP19* under the control of CaMV 35S promoter. **(B)** RT-qPCR analysis. Transcript levels of *GhABP19* in transgenic *Arabidopsis* lines relative to the line with the lowest transgene expression (L10). All measurements were normalized with the *EF1a* transcript level. Data were collected from three independent biological samples per treatment and three technical replicates per samples. Error bars represent standard error. Asterisks indicate a significant difference (\* $P < 0.05$  and \*\* $P < 0.01$ , Student's *t* test).
